# Supplementary material for: A combination of curcumin and oligomeric proanthocyanidins offer superior anti-tumorigenic properties in colorectal cancer
Source: PubMed Central journal article supplement (PMC6138725; doi:10.1038/s41598-018-32267-8), 2018-09-14
Supplement: 41598_2018_32267_MOESM1_ESM.pdf [file 41598_2018_32267_MOESM1_ESM.pdf]

# **A combination of curcumin and oligomeric proanthocyanidins offer superior anti-tumorigenic properties in colorectal cancer**

Preethi Ravindranathan<sup>1</sup>, Divya Pasham<sup>1</sup>, Uthra Balaji<sup>2</sup>, Jacob Cardenas<sup>2</sup>, Jinghua Gu<sup>2</sup>, Shusuke Toden<sup>1</sup> and Ajay Goel<sup>1\*</sup>

<sup>1</sup> Center for Gastrointestinal Research, Center for Translational Genomics and Oncology, Baylor Scott & White Research Institute and Charles A Sammons Cancer Center, Baylor University Medical Center, Dallas, Texas, USA

<sup>2</sup> Baylor Research Institute and Sammons Cancer Center, Baylor University Medical Center, Dallas, Texas, USA

---

## **Supplementary Figures and Tables**

# Suppl Figure 1. Calculation of Cooperativity: Highest single agent

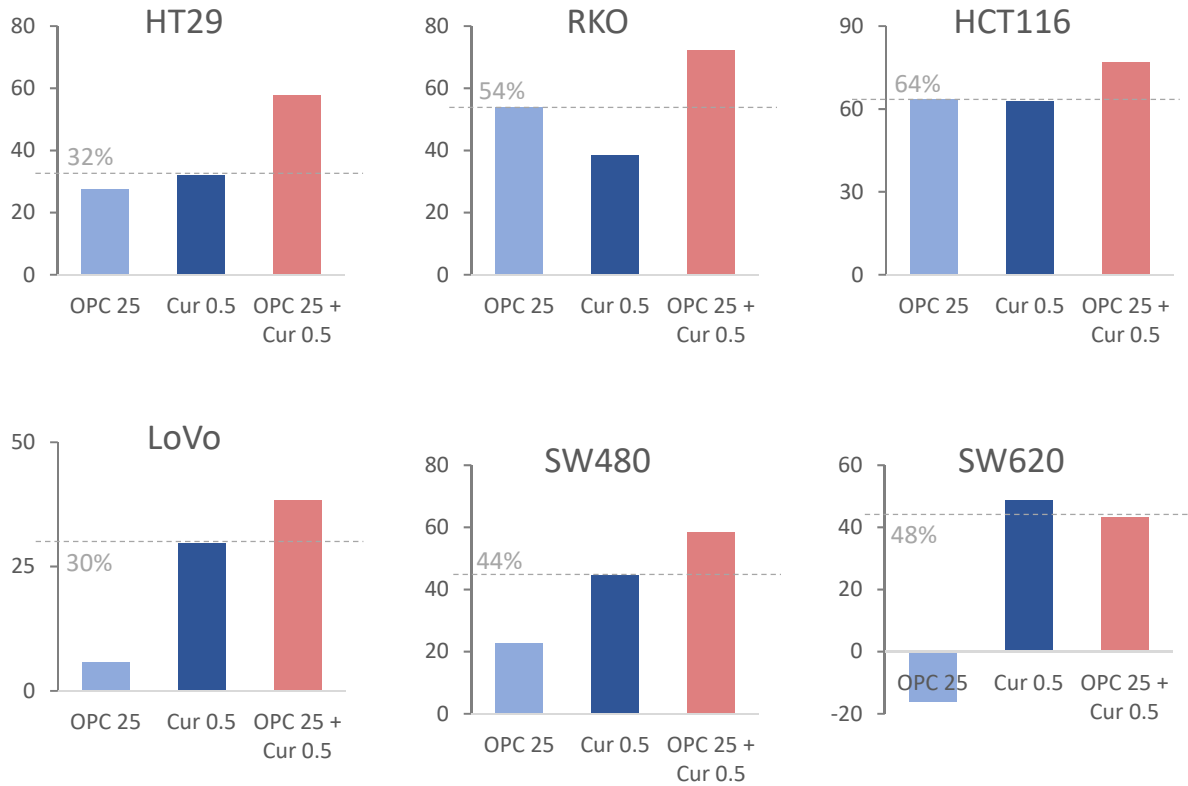

| Cell line | CI index |
|-----------|----------|
| HT29      | 0.55     |
| LoVo      | 0.15     |
| RKO       | 0.75     |
| SW480     | 0.76     |
| HCT116    | 0.83     |
| SW620     | 1.12     |

## Suppl Figure 2. Calculation of Cooperativity: Bliss Independence

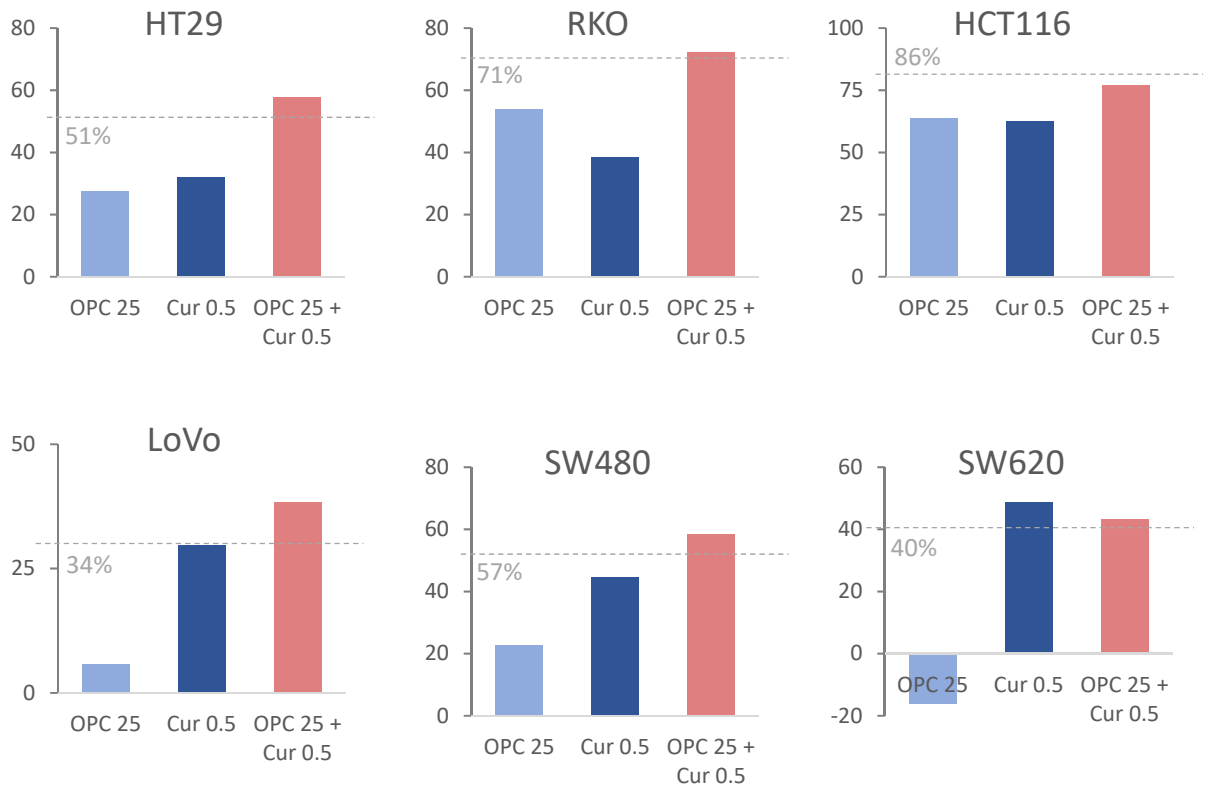

| Cell line | CI index |
|-----------|----------|
| HT29      | 0.88     |
| LoVo      | 0.87     |
| RKO       | 0.99     |
| SW480     | 0.98     |
| HCT116    | 1.12     |
| SW620     | 0.93     |

# Suppl Figure 3: Top pathways regulated uniquely by OPC, Curcumin and OPC-Cur combination

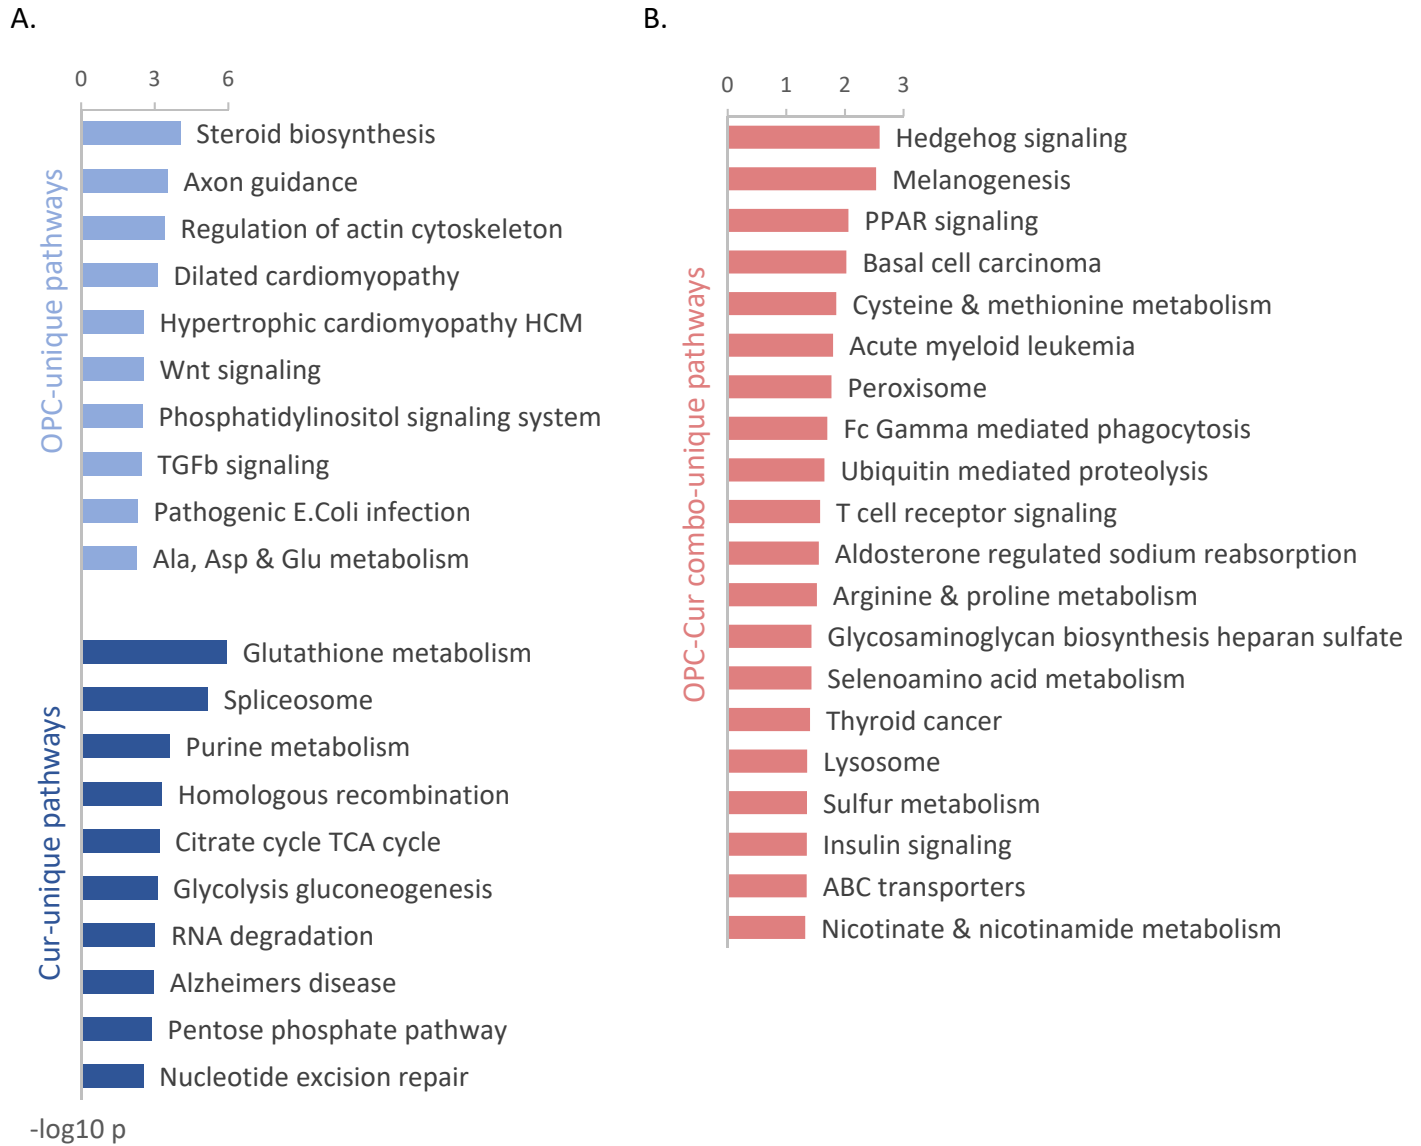

# Suppl Figure 4: Animal weight during the course of treatment

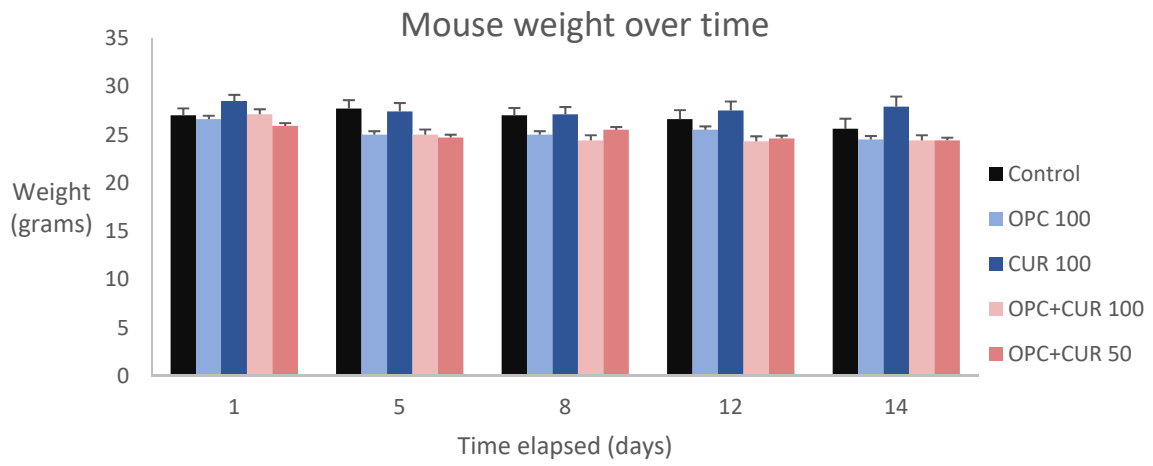

Suppl Table 1: Clinicopathologic characteristics of the 3 patients whose primary colorectal tumor tissues were used to develop organoid cultures

| <b>Organoid</b> | <b>Patient Age</b> | <b>Gender</b> | <b>Tumor Location</b> | <b>Tumor Type</b> | <b>TNM stage</b> | <b>Pathology diff/ undiff</b> | <b>Local Invasion</b> | <b>Tumor Size(mm)</b> |
|-----------------|--------------------|---------------|-----------------------|-------------------|------------------|-------------------------------|-----------------------|-----------------------|
| #1              | 67                 | F             | Cecum                 | Adenocarcinoma    | pT4b N1b         | moderate                      | present               | 40                    |
| #2              | 89                 | F             | Cecum                 | Adenocarcinoma    | pT3 N2b          | moderate                      | present               | 56                    |
| #3              | 50                 | M             | Sigmoid Colon         | Adenocarcinoma    | pT4b N0 M1a      | moderate                      | present               | 64                    |

## Suppl Table 2: qPCR primers

---

### Primer sequences

|          |                               |
|----------|-------------------------------|
| PCNA-F   | 5'-CCATCCTCAAGAAGGTGTTGG-3'   |
| PCNA-R   | 5'-GTGTCCCATATCCGCAATTTTAT-3' |
| CCND1-F  | 5'-CCATCCAGTGGAGGTTTGTC-3'    |
| CCND1-R  | 5'-GTGGGACAGGTGGCCTTT-3'      |
| E2F1-F   | 5'-AAGGGATTGGAGGCGTAGA-3'     |
| E2F1-R   | 5'-CGCCAGTCAAACCTGGTCTC-3'    |
| p21-F    | 5'-AGGTGGACCTGGAGACTCTCAG-3'  |
| p21-R    | 5'-TCCTCTTGGAGAAGATCAGCCG-3'  |
| HSPA5-F  | 5'-TAGTGCAAGCTGAAGGCTGA-3'    |
| HSPA5-R  | 5'-GATCTCGGCTCACTGCAAC-3'     |
| SEC61B-F | 5'-CTCATCTCCAATATGCCTGGT-3'   |
| SEC61B-R | 5'-CACTGCTTTGCTGGGAGAG-3'     |
| G6PD-F   | 5'-TAGGCAGCCTCTCTGCTATAA-3'   |
| G6PD-R   | 5'-GGGCTGTTTGCGGATTTAATG-3'   |
| GCLC-F   | 5'-GACCCATGGAGGTGCAATTA-3'    |
| GCLC-R   | 5'-CTGGTGAGCAGTACCACAAA-3'    |
| HMOX1-F  | 5'-TCAGGCAGAGGGTGATAGAA -3'   |
| HMOX1-R  | 5'-GCTCCTGCAACTCCTCAAA-3'     |
| BDNF-F   | 5'-CCATGACCAGAAGGGAAACA-3'    |
| BDNF-R   | 5'-CGGCAACAAACCACAACATTA-3'   |
| IHH-F    | 5'-CTGAGCTGGGGGACACTG-3'      |
| IHH-R    | 5'-GCCCAGTCAAGTCTCAATGG-3'    |
| PDE3B-F  | 5'-GTGATGATGAAGACGGTGAAGA-3'  |
| PDE3B-R  | 5'-TTCAGTGAGGTGGTGCATTAG-3'   |

---

### Suppl Table 3: Dose-reduction indices

| Cell line | DRI <sub>50</sub> for OPCs | DRI <sub>50</sub> for Curcumin |
|-----------|----------------------------|--------------------------------|
| RKO       | 3.04                       | 1.26                           |
| HCT116    | 3.47                       | 0.28                           |
| LoVo      | 4.66                       | 1.22                           |
| SW480     | 3.97                       | 1.73                           |
| HT29      | 4.66                       | 0.57                           |
| SW620     | 3.58                       | 1.14                           |

DRI<sub>50</sub>: Drug Reduction Index at 50% efficacy for each agent
